# Supplementary material
Source: Elsevier journal article supplement (https://www.sciencedirect.com/science/article/pii/S1885585720301080)

# Coronary lithoplasty for calcified lesions: real-world multicenter registry

## SUPPLEMENTARY DATA

**Figure 1 of the supplementary data.** Quantitative coronary angiography characterization of calcified lesions before and after procedure. DS, diameter stenosis; RVD, reference vessel diameter.

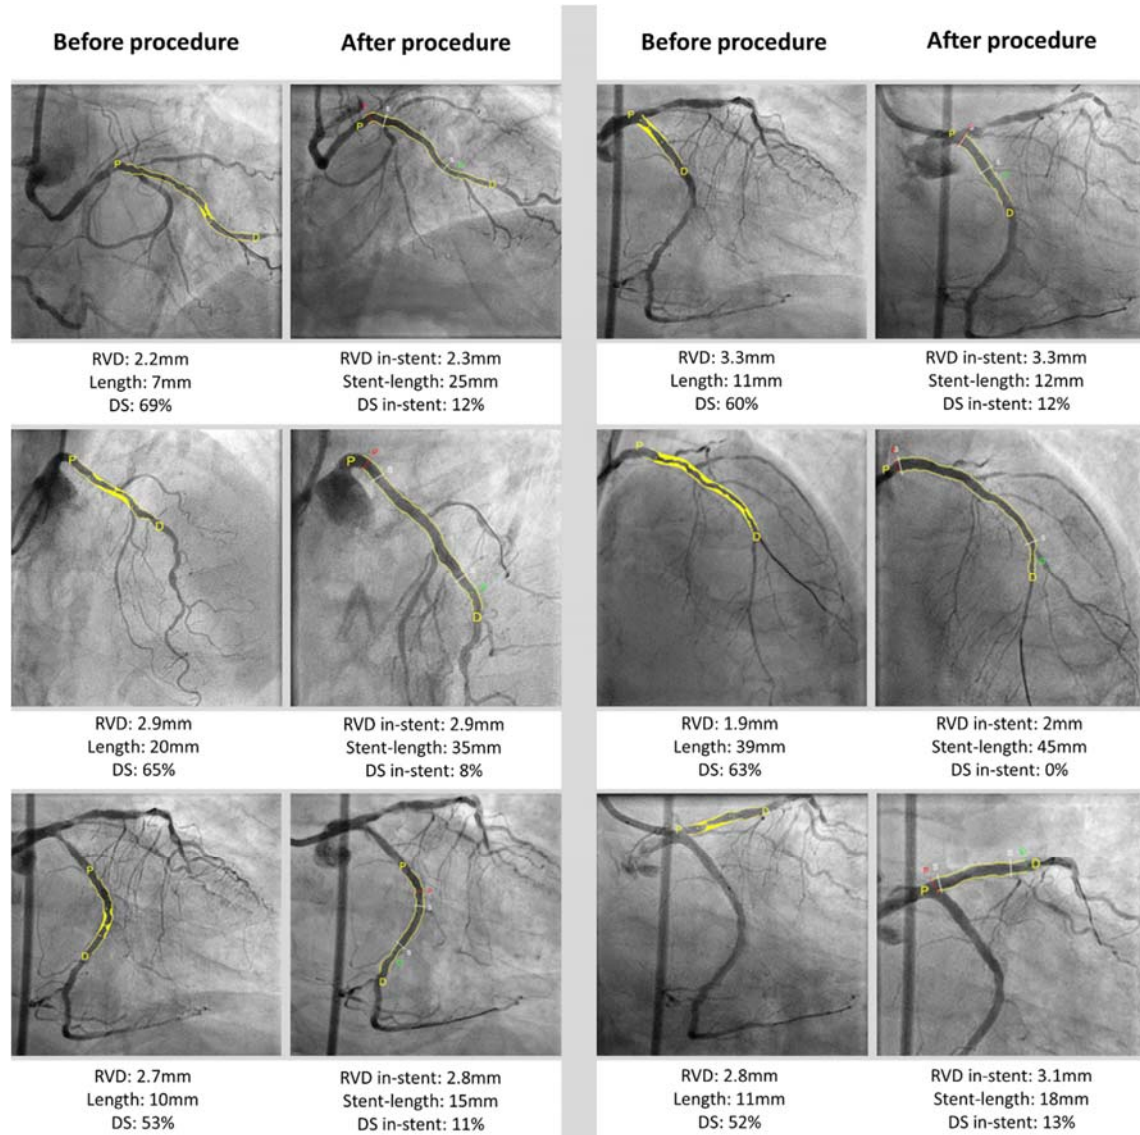

Supplement: mmc1 [file mmc1.pdf]
